# Supplementary material for: Ruthenium-catalyzed stereospecific decarboxylative allylation of non-stabilized ketone enolates
Source: Royal Society of Chemistry journal article supplement (doi:10.1039/b503568f), 2005-01-01
Supplement: b503568f.pdf [file b503568f.pdf]

# Ruthenium-catalyzed Stereospecific Decarboxylative Allylation of Unstabilized Ketone Enolates.

Erin C. Burger and Jon A. Tunge\*

*Department of Chemistry, University of Kansas, Lawrence, KS 66045*

## Supporting Information

### Experimental

**Materials.** Methylene chloride was dried over activated alumina. All other materials were used as received.  $\beta$ -keto esters **1a-1f** were prepared by the addition of diketene to the corresponding allylic alcohols,<sup>1</sup> which had previously been subjected to enzymatic resolution with Lipase AK “Amano” 20.<sup>2</sup> **1c** degraded slightly on SiO<sub>2</sub> and therefore was used without further purification. **1f** was prepared by alkylation of **1a** using methyl iodide and potassium *tert*-butoxide.<sup>3</sup>  $\beta$ -keto esters **1g** and **1h** were prepared by the condensation of the corresponding acid chloride with Meldrum’s acid<sup>4</sup> followed by addition of the appropriate allylic alcohol.<sup>5</sup> <sup>1</sup>H NMR spectra were referenced to residual protio solvent signals. Structural assignments are based on <sup>1</sup>H, <sup>13</sup>C, DEPT-135, COSY, and HMQC spectroscopies. Enantioselectivities were determined on a Diacel Chiralpak AD or OD-H HPLC column.

**General procedure for catalytic Carroll rearrangements:** In a Schlenk tube under argon, [RuCp\*Cl]<sub>4</sub> (2.5 mol%) and bipyridine (10 mol%) were dissolved in 2 mL of methylene chloride. The resulting deep purple solution was allowed to stir briefly before addition of allyl- $\beta$ -keto ester (0.5 mmole) in 3 mL of methylene chloride *via* cannula. The reaction was allowed to stir under Ar until the resulting dark burnt orange solution returned to purple. Following solvent evaporation the crude product was purified *via* flash chromatography (SiO<sub>2</sub>, 5% Et<sub>2</sub>O:Hex), providing products in > 95% purity as determined by <sup>1</sup>H NMR spectroscopy.

<sup>1</sup> S. Wilson and C. Augelli, *Org. Synth.*, 1990, **68**, 210.

<sup>2</sup> (a) K. Burgess and L. Jennings, *J. Am. Chem. Soc.*, 1990, **112**, 7434; (b) K. Burgess and L. Jennings, *J. Am. Chem. Soc.*, **113**, 6129.

<sup>3</sup> H. Lee, J. Park, B. Kim and S. Gellman, *J. Org. Chem.*, 2003, **68**, 1575.

<sup>4</sup> N. Svenstrup, K. Simonsen, N. Thorup, J. Brodersen, W. Dehaen and J. Becher, *J. Org. Chem.*, 1999, **64**, 2814.

<sup>5</sup> F. Yuste, F. Brena, H. Barrios, R. Sanchez-Obregon, B. Ortiz and F. Walls, *Synth. Commun.* 1988, **18**, 735.

# Supplementary Material (ESI) for Chemical Communications  
# This journal is © The Royal Society of Chemistry 2005

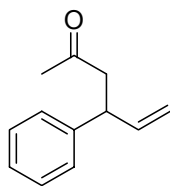

**1a:**<sup>6</sup> Separated enantiomers on Diacel Chiralpak AD HPLC column (99.0% Hexane/IPA, 0.5 mL/min)  $t_r = 13.3, 14.7$  min.

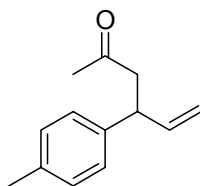

**1b:**<sup>6</sup> Separated enantiomers on Diacel Chiralpak AD HPLC column (99.0% Hexane/IPA, 0.5 mL/min) -  $t_r = 12.9, 14.4$  min.

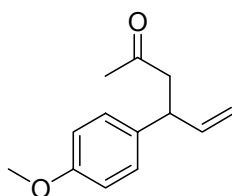

**1c:**<sup>6</sup> Separated enantiomers on Diacel Chiralpak AD HPLC column (97.0% Hexane/IPA, 1.0 mL/min) -  $t_r = 6.8, 7.7$  min.

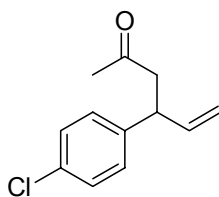

**1d:**<sup>6</sup> Separated enantiomers on Diacel Chiralpak AD HPLC column (99.0% Hexane/IPA, 1.0 mL/min) -  $t_r = 7.7, 8.9$  min.

---

<sup>6</sup> E. Burger and J. Tunge, *Org. Lett.*, 2004, **6**, 2603.

# Supplementary Material (ESI) for Chemical Communications  
# This journal is © The Royal Society of Chemistry 2005

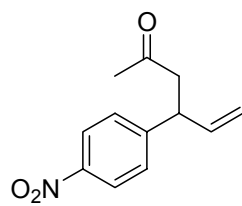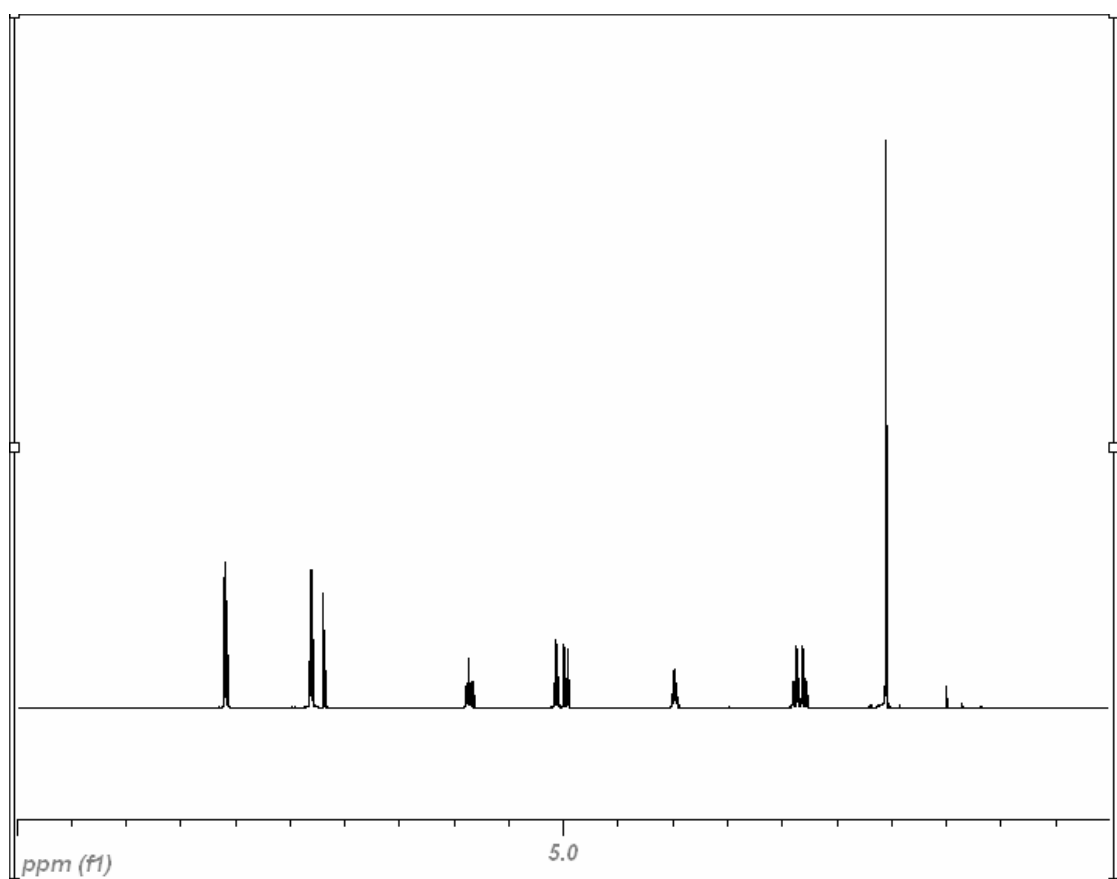

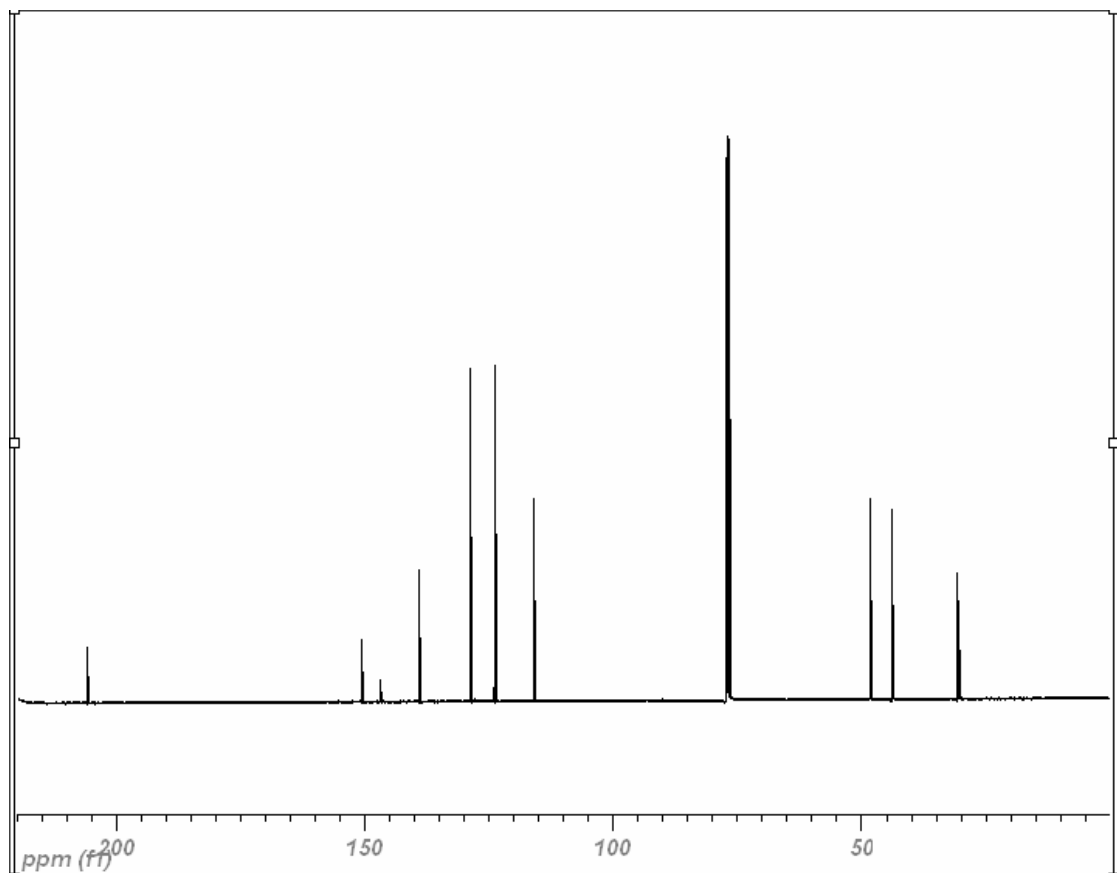

**1e:**  $^1\text{H}$  NMR (500 MHz,  $\text{CDCl}_3$ )  $\delta$  8.10 (d,  $J = 9$  Hz, 2H: arom. H), 7.31 (d,  $J = 9$  Hz, 2H: arom. H), 5.87 (ddd,  $J = 7$  Hz, 10 Hz, 17 Hz, 1H:  $\text{CH}=\text{CH}_2$ ), 5.07 (d,  $J = 10$  Hz, 1H:  $\text{CH}=\text{CH}(H)_{\text{cis}}$ ), 4.98 (d,  $J = 17$  Hz, 1H:  $\text{CH}=\text{CH}(H)_{\text{trans}}$ ), 3.98 (app. q,  $J = 7$  Hz, 1H: CH), 2.88 (dd,  $J = 7$  Hz, 17 Hz, 1H: diastereotopic  $\text{CH}_2$ ), 2.80 (dd,  $J = 7$  Hz, 17 Hz, 1H: diastereotopic  $\text{CH}_2$ ), 2.05 (s, 3H:  $\text{CH}_3$ ).  $^{13}\text{C}$  NMR (75 MHz,  $\text{CDCl}_3$ )  $\delta$  205.76 (C=O), 150.57 (arom. C), 146.72 (arom. C), 139.06 ( $\text{CH}=\text{CH}_2$ ), 128.66 (arom. CH), 124.08 (arom. CH), 116.02 ( $\text{CH}=\text{CH}_2$ ), 48.52 ( $\text{CH}_2$ ), 43.94 (CH), 30.63 ( $\text{CH}_3$ ). IR ( $\text{CDCl}_3$ ):  $\nu_{\text{max}}$  1716, 1522, 1348. HRMS calcd for  $\text{C}_{12}\text{H}_{14}\text{NO}_3$   $[\text{M}+\text{H}] = 220.0974$ , found 220.0976. Separated enantiomers on Diacel Chiralpak AD HPLC column (94.0% Hexane/IPA, 1.0 mL/min) -  $t_{\text{r}} = 10.3, 11.5$  min.

# Supplementary Material (ESI) for Chemical Communications  
# This journal is © The Royal Society of Chemistry 2005

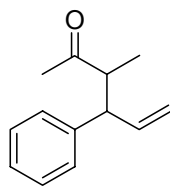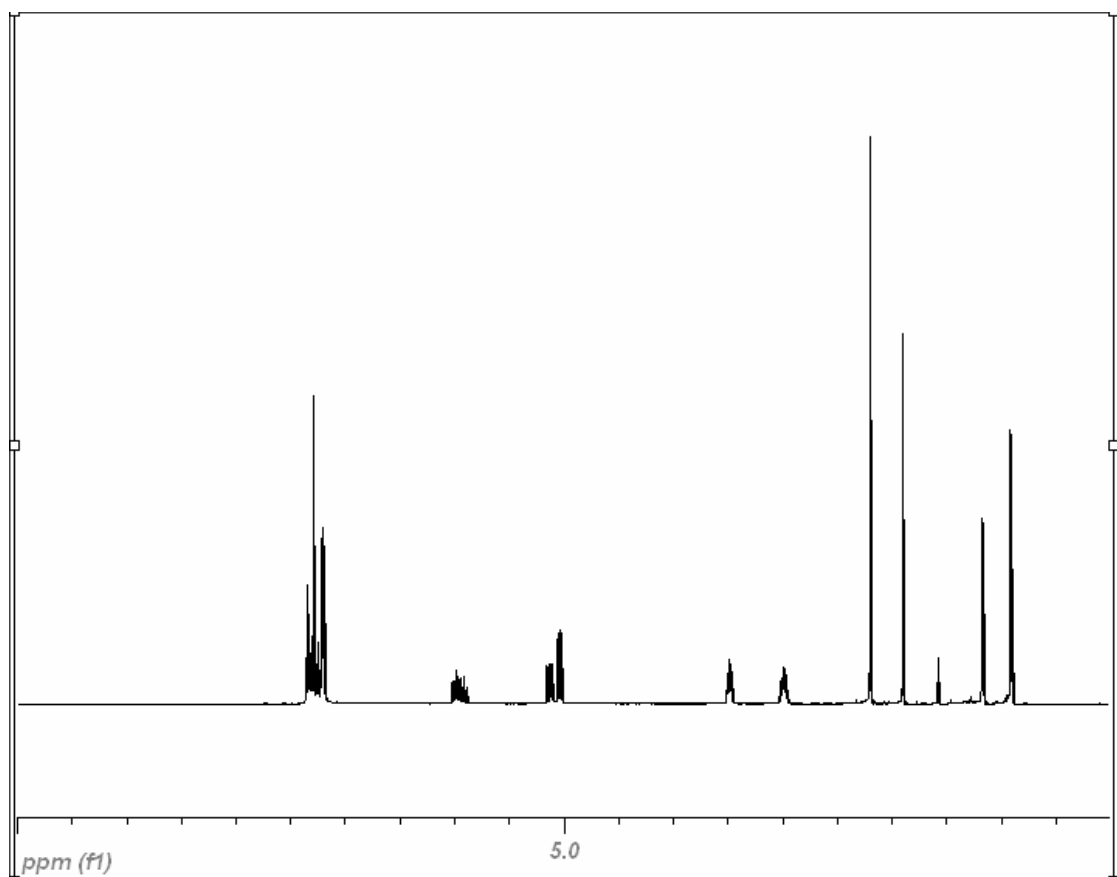

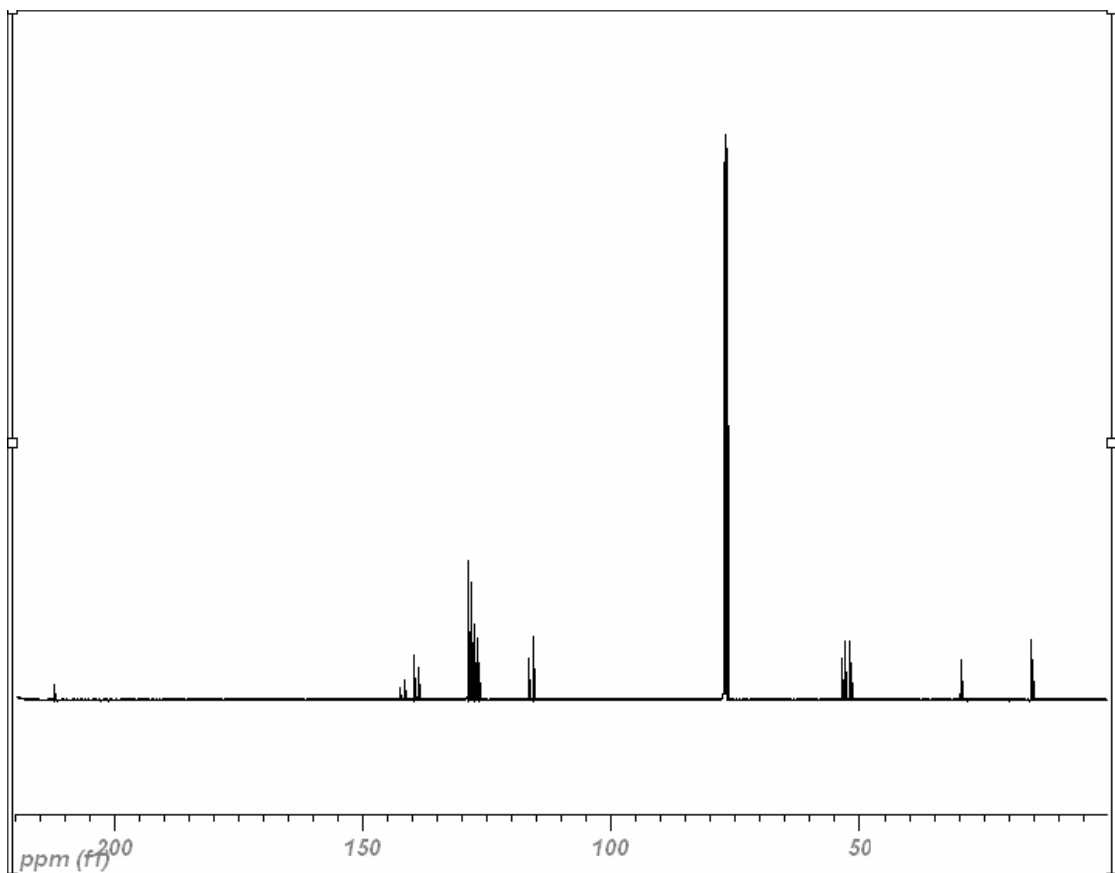

**1f:**<sup>7</sup> <sup>1</sup>H NMR (500 MHz, CDCl<sub>3</sub>) Major diastereomer:  $\delta$  7.28 (broad overlapping m, 5H: arom. H), 5.96 (overlapping m, 1H: CH=CH<sub>2</sub>), 5.09 (overlapping m, 1H: CH=CH(*H*)<sub>cis</sub>), 5.09 (overlapping m, 1H: CH=CH(*H*)<sub>trans</sub>), 3.49 (overlapping m, 1H: Ph-CH), 2.99 (overlapping dq, *J* = 7 Hz, 10 Hz, 1H: CH-CH<sub>3</sub>), 2.20 (s, 3H: (CO)CH<sub>3</sub>), 0.91 (d, *J* = 7 Hz, 3H: CH-CH<sub>3</sub>). <sup>13</sup>C NMR (75 MHz, CDCl<sub>3</sub>)  $\delta$  212.17 (C=O), 141.44 (arom. C), 139.69 (CH=CH<sub>2</sub>), 128.71 (arom. CH), 128.10 (arom. CH), 126.73 (arom. CH), 115.68 (CH=CH<sub>2</sub>), 53.07 (CH-Ph), 52.00 (CH-CH<sub>3</sub>), 29.48 (CH<sub>3</sub>-(CO)), 15.58 (CH-CH<sub>3</sub>).  
Minor diastereomer:  $\delta$  7.28 (broad overlapping m, 5H: arom. H), 5.96 (overlapping m, 1H: CH=CH<sub>2</sub>), 5.09 (overlapping m, 1H: CH=CH(*H*)<sub>cis</sub>), 5.09 (overlapping m, 1H: CH=CH(*H*)<sub>trans</sub>), 3.49 (overlapping m, 1H: Ph-CH), 2.99 (overlapping dq, *J* = 7 Hz, 10 Hz, 1H: CH-CH<sub>3</sub>), 1.90 (s, 3H: (CO)CH<sub>3</sub>), 1.74 (d, *J* = 7 Hz, 3H: CH-CH<sub>3</sub>). <sup>13</sup>C NMR (75 MHz, CDCl<sub>3</sub>)  $\delta$  212.00 (C=O), 142.52 (arom. C), 138.85 (CH=CH<sub>2</sub>), 128.53 (arom. CH), 127.63 (arom. CH), 126.08 (arom. CH), 116.57 (CH=CH<sub>2</sub>), 53.41 (CH-Ph), 51.60 (CH-CH<sub>3</sub>), 29.68 (CH<sub>3</sub>-(CO)), 15.33 (CH-CH<sub>3</sub>). IR (CDCl<sub>3</sub>):  $\nu_{\max}$  1711, 1454, 1356. HRMS calcd for C<sub>13</sub>H<sub>17</sub>O [M+H] = 189.1279, found 189.1278. Separated

<sup>7</sup> (a) W. Daub, J. Edwards, C. Okada, J. Allen, C. Maxey, M. Wells, A. Goldstein, M. Dibley, C. Wang, D. Ostercamp, S. Chung, P. Cunningham and M. Berliner, *J. Org. Chem.*, 1997, **62**, 1976; (b) W. Daub, M. McCoy, M. Sanchez, and J. Carter, *J. Org. Chem.*, 1983, **48**, 3876; (c) W. Daub, M. Sanchez, R. Cromer and L. Gibson, *J. Org. Chem.*, 1982, **47**, 743; (d) D. McGreer and J. McKinley, *Can. J. Chem.*, 1971, **49**, 105.

# Supplementary Material (ESI) for Chemical Communications  
# This journal is © The Royal Society of Chemistry 2005

enantiomers on Diacel Chiralpak OD-H HPLC column (99.8% Hexane/IPA, 0.5 mL/min) -  $t_r$ (major) = 21.7, 22.9 min,  $t_r$ (minor) = 25.4, 25.9 min.

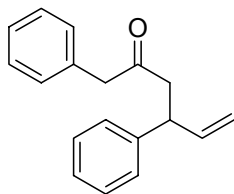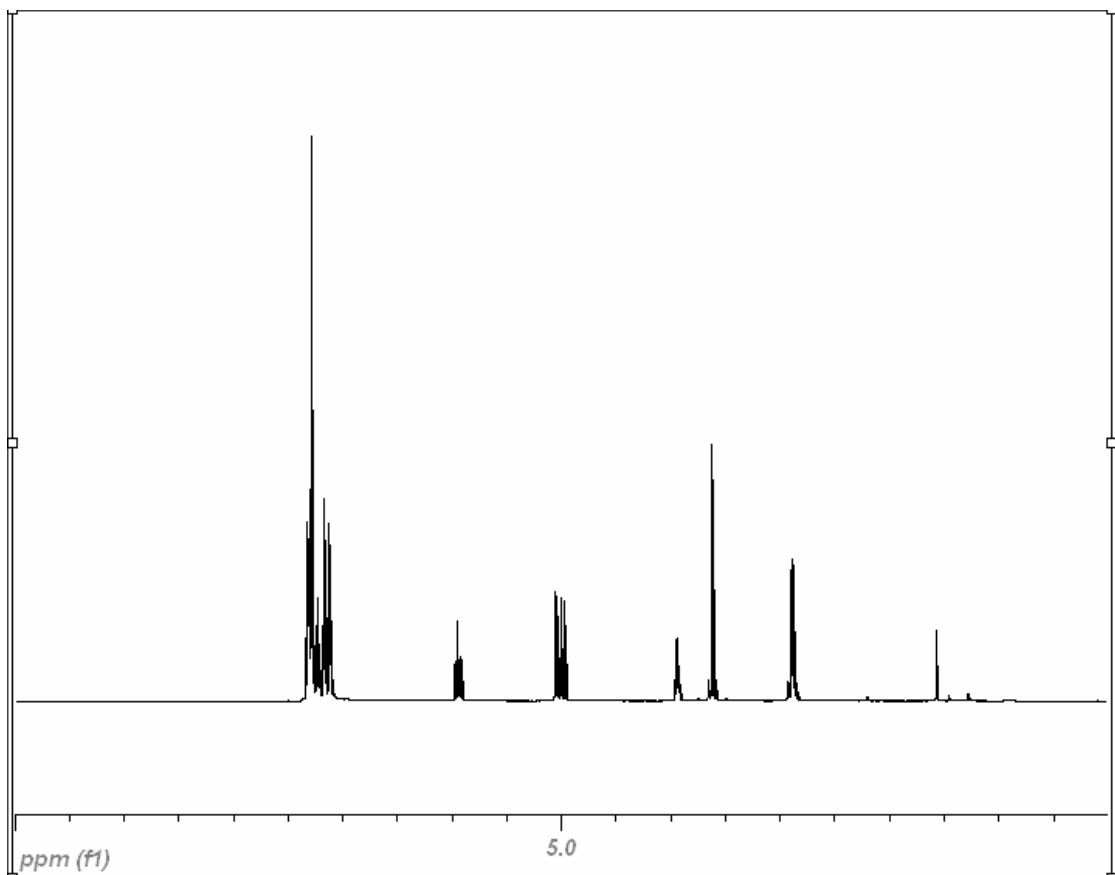

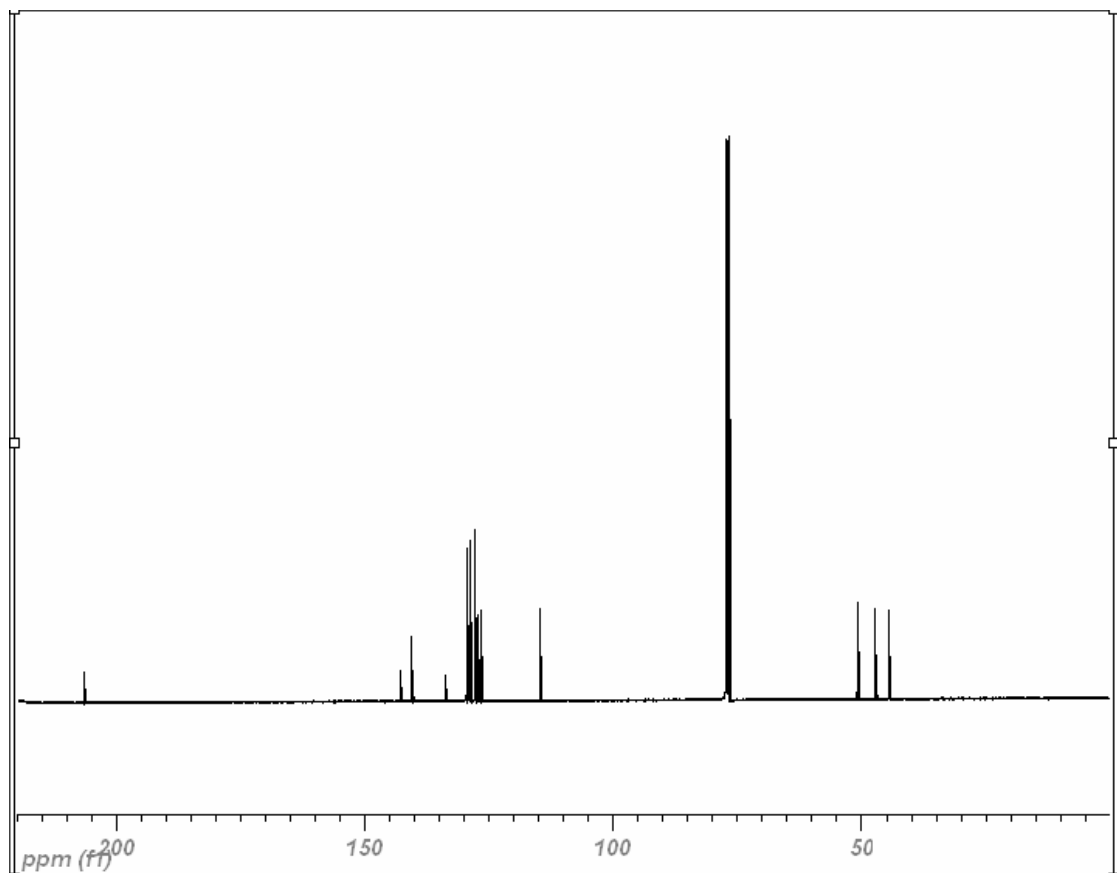

**1g:**  $^1\text{H}$  NMR (500 MHz,  $\text{CDCl}_3$ )  $\delta$  7.32 (m, 5H: arom. H), 7.24 (m, 1H: arom. CH), 7.17 (d,  $J = 7$  Hz, 2H: arom. CH), 7.12 (d,  $J = 7$  Hz, 2H: arom. CH), 5.95 (ddd,  $J = 7$  Hz, 10 Hz, 17 Hz, 1H:  $\text{CH}=\text{CH}_2$ ), 5.05 (d,  $J = 10$  Hz, 1H:  $\text{CH}=\text{CH}(H)_{\text{cis}}$ ), 4.98 (d,  $J = 17$  Hz, 1H:  $\text{CH}=\text{CH}(H)_{\text{trans}}$ ), 3.94 (app. q,  $J = 7$  Hz, 1H: CH), 3.64 (d,  $J = 15$  Hz, 1H: diastereotopic Ph- $\text{CH}_2$ ), 3.61 (d,  $J = 15$  Hz, 1H: diastereotopic Ph- $\text{CH}_2$ ), 2.91 (dd,  $J = 7$  Hz, 16 Hz, 1H: diastereotopic (CO) $\text{CH}_2$ ), 2.86 (dd,  $J = 7$  Hz, 16 Hz, 1H: diastereotopic (CO) $\text{CH}_2$ ).  $^{13}\text{C}$  NMR (75 MHz,  $\text{CDCl}_3$ )  $\delta$  206.40 (C=O), 142.71 (arom. C), 140.45 ( $\text{CH}=\text{CH}_2$ ), 133.82 (arom. CH), 129.47 (arom. CH), 128.72 (arom. CH), 128.60 (arom. CH), 127.65 (arom. CH), 127.04 (arom. CH), 126.60 (arom. CH), 114.65 ( $\text{CH}=\text{CH}_2$ ), 50.89 (Ph- $\text{CH}_2$ ), 47.17 ((CO) $\text{CH}_2$ ), 44.49 (CH). IR ( $\text{CDCl}_3$ ):  $\nu_{\text{max}}$  1715, 1495, 1454. HRMS calcd for  $\text{C}_{18}\text{H}_{19}\text{O}$  [ $\text{M}+\text{H}$ ] = 251.1436, found 251.1432. Separated enantiomers on Diacel Chiralpak AD HPLC column (99.0% Hexane/IPA, 0.5 mL/min) -  $t_r$  = 18.4, 20.2 min.



# Supplementary Material (ESI) for Chemical Communications  
# This journal is © The Royal Society of Chemistry 2005

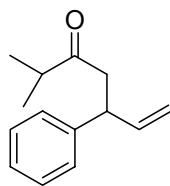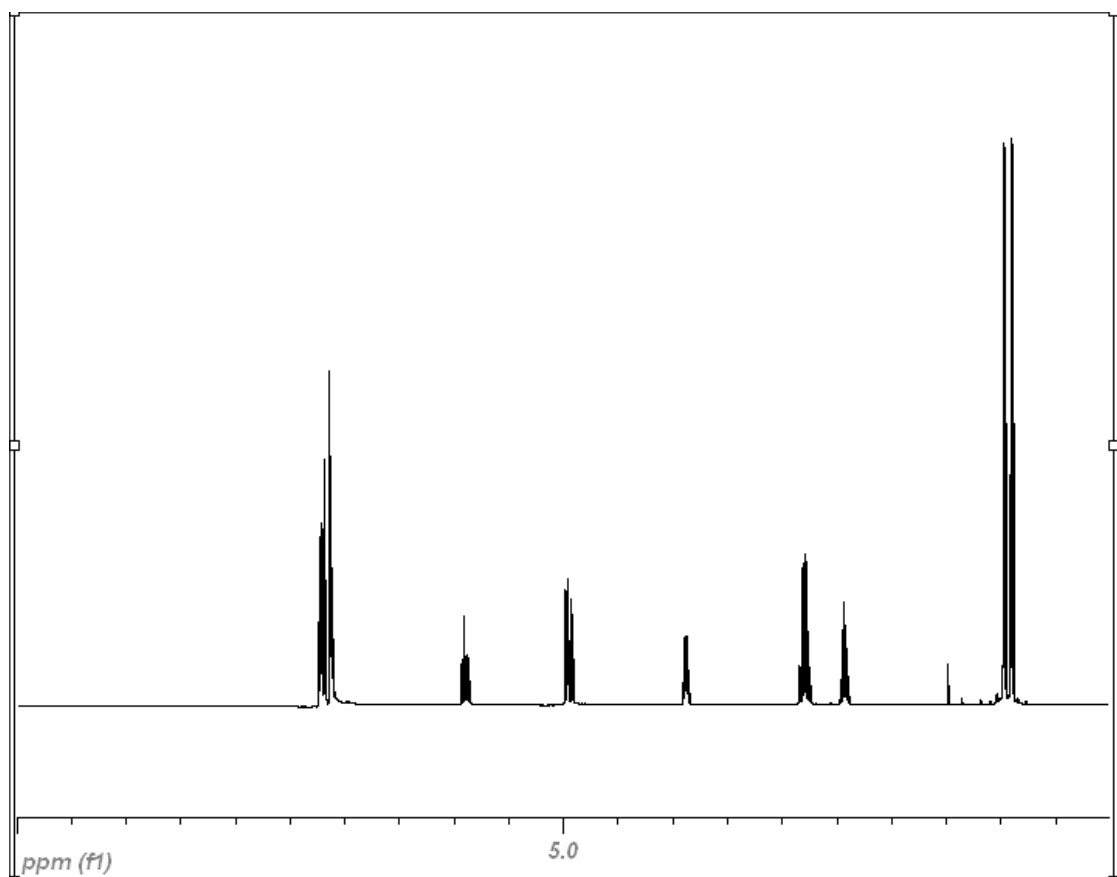

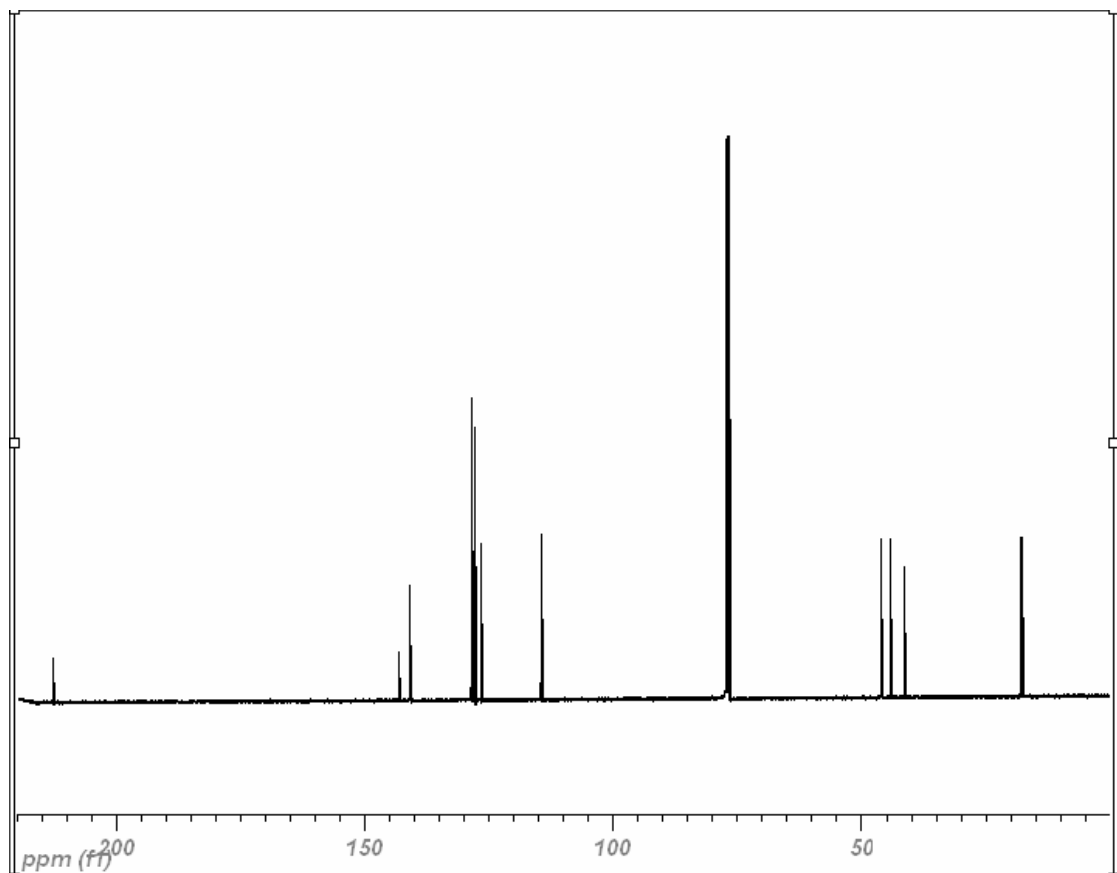

**1h:**<sup>8,7b,7c</sup> <sup>1</sup>H NMR (500 MHz, CDCl<sub>3</sub>)  $\delta$  7.21 (m, 2H: arom. H), 7.13 (m, 3H: arom. H), 5.91 (ddd,  $J = 7$  Hz, 10 Hz, 17 Hz, 1H: CH=CH<sub>2</sub>), 4.98 (d,  $J = 10$  Hz, 1H: CH=CH(*H*)<sub>cis</sub>), 4.94 (d,  $J = 17$  Hz, 1H: CH=CH(*H*)<sub>trans</sub>), 3.88 (app. q,  $J = 7$  Hz, 1H: Ph-CH), 2.83 (dd,  $J = 7$  Hz, 17 Hz, 1H: diastereotopic CH<sub>2</sub>), 2.77 (dd,  $J = 7$  Hz, 17 Hz, 1H: diastereotopic CH<sub>2</sub>), 2.43 (sep.,  $J = 7$  Hz, 1H: CH-(CH<sub>3</sub>)<sub>2</sub>), 0.97 (d,  $J = 7$  Hz, 3H: diastereotopic CH<sub>3</sub>), 0.90 (d,  $J = 7$  Hz, 3H: diastereotopic CH<sub>3</sub>). <sup>13</sup>C NMR (75 MHz, CDCl<sub>3</sub>)  $\delta$  212.65 (C=O), 143.15 (arom. C), 140.77 (CH=CH<sub>2</sub>), 128.56 (arom. CH), 127.69 (arom. CH), 126.52 (arom. CH), 114.53 (CH=CH<sub>2</sub>), 45.94 (CH<sub>2</sub>), 44.30 (CH-(CH<sub>3</sub>)<sub>2</sub>), 41.37 (PhCH), 17.94 (diastereotopic CH<sub>3</sub>), 17.83 (diastereotopic CH<sub>3</sub>). IR (CDCl<sub>3</sub>):  $\nu_{\text{max}}$  1709, 1452, 1385, 1364. HRMS calcd for C<sub>14</sub>H<sub>19</sub>O [M+H] = 203.1436, found 203.1433. Separated enantiomers on Diacel Chiralpak AD HPLC column (99.0% Hexane/IPA, 0.5 mL/min) -  $t_r$  = 9.5, 10.5 min.

<sup>8</sup> T. Hirao, T. Fujii and Y. Ohshiro, *Tetrahedron*, 1994, **50**, 10207.

**Determination of the absolute configuration of 3a.**

**3a** (0.4 mmol) was cleanly hydrogenated under *ca.* 1 atm. H<sub>2</sub> at 50 °C overnight using catalytic Pd on charcoal (20 mg) in ethanol. A clear oil was produced following filtration through Celite and concentration under reduced pressure. A specific rotation of  $[\alpha]_D^{24} = -18.5$  was determined in ethanol, thus establishing the formation of (*R*)-(-)-4-phenyl hexanone which corresponds to an (*S*)-configuration for substrate **3a**. It should be noted that the specific rotation was calculated assuming 100% product isolation after hydrogenation, so the ee calculated using this number is not accurate.

**Regioselectivities:**

| <b>Substrate</b> | <b>R<sub>t</sub> branched</b> | <b>R<sub>t</sub> linear</b> | <b>Branched:linear</b> |
|------------------|-------------------------------|-----------------------------|------------------------|
| 3a               | 7.7 min                       | 9.9 min                     | 75:1                   |
| 3b               | 8.9 min                       | 11.5 min                    | 101:1                  |
| 3c               | 11.0 min                      | 15.4 min                    | 19:1                   |
| 3d               | 10.1 min                      | 13.4 min                    | 89:1                   |
| 3f               | 8.1,8.3 min                   | 10.5 min                    | 59:1                   |
| 3g               | 16.6 min                      | 20.4 min                    | 20:1                   |
| 3h               | 12.2 min                      | 9.4 min                     | 38:1                   |

Isomers separated on a Restek Rtx-5 GC column. Substrates **3a-f** and **3h**: injector temp = 200 °C, detector temp = 250 °C, ramp 50 °C to 150 C at 10 °/min. Substrate **3g**: injector temp = 200 °C, detector temp = 250 °C, ramp 100 °C to 200 °C at 5 °/min.
